# Supplementary material for: Cr3+-activated Na3X2Li3F12 (X = Al, Ga, or In) garnet phosphors with broadband NIR emission and high luminescence efficiency for potential biomedical application
Source: Royal Society of Chemistry journal article supplement (doi:10.1039/d1tc03763c), 2021-01-01
Supplement: d1tc03763c1.pdf [file d1tc03763c1.pdf]

**Cr<sup>3+</sup>-activated Na<sub>3</sub>X<sub>2</sub>Li<sub>3</sub>F<sub>12</sub> (X=Al, Ga, In) garnet phosphors with  
broadband NIR emission and high luminescence efficiency for  
potential biomedical application**

Wendong Nie, <sup>a,c</sup> Yan Li, <sup>a,c</sup> Jiaying Zuo, <sup>a,c</sup> Yankui Kong, <sup>a,c</sup> Wanfang zou, <sup>a,c</sup> Gaung

Chen, <sup>a,c</sup> Jiaqing Peng, <sup>\*,a,c</sup> Fu Du, <sup>a,c</sup> Lei Han, <sup>\*,a,c</sup> Xinyu Ye <sup>\*,a,b,c,d</sup>

<sup>a</sup> *College of Rare Earths, Jiangxi University of Science and Technology,*

*Ganzhou 341000, PR China*

<sup>b</sup> *National Engineering Research Center for Ionic Rare Earth, Ganzhou, 341000,*

*PR China*

<sup>c</sup> *Key Laboratory of Rare Earth Luminescence Materials and Devices of Jiangxi*

*Province, Jiangxi University of Science and Technology, Ganzhou 341000, PR China*

<sup>d</sup> *Nation Rare Earth Functional Materials Manufacturing Innovation Centre,*

*Ganzhou, 341000, PR China*

\*Corresponding author:

E-mail addresses: jiaqpeng@hotmail.com(J. Peng); hl89119924@jxust.edu.cn(L.

Han); xinyue@yahoo.com (X. Ye);

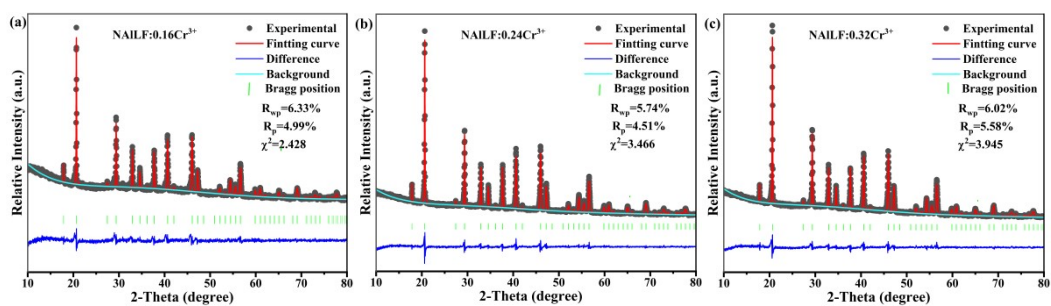

S1 Rietveld refinements of NAILF:0.16Cr<sup>3+</sup> (a), NAILF:0.24Cr<sup>3+</sup> (b) and NAILF:0.32Cr<sup>3+</sup> (c).

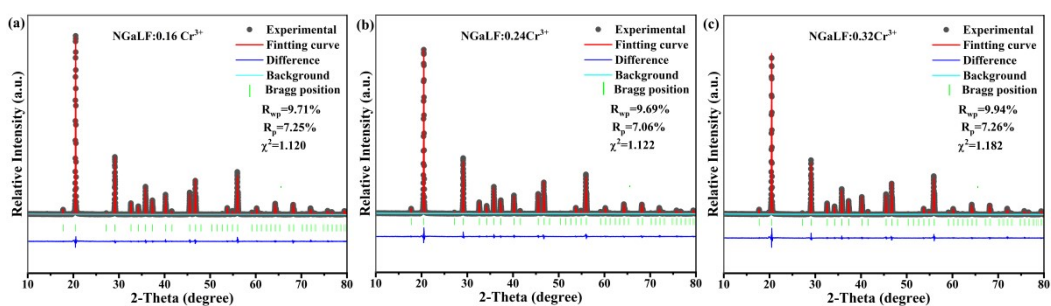

S2 Rietveld refinements of NGaLF:0.16Cr<sup>3+</sup> (a), NGaLF:0.24Cr<sup>3+</sup> (b) and NGaLF:0.32Cr<sup>3+</sup> (c).

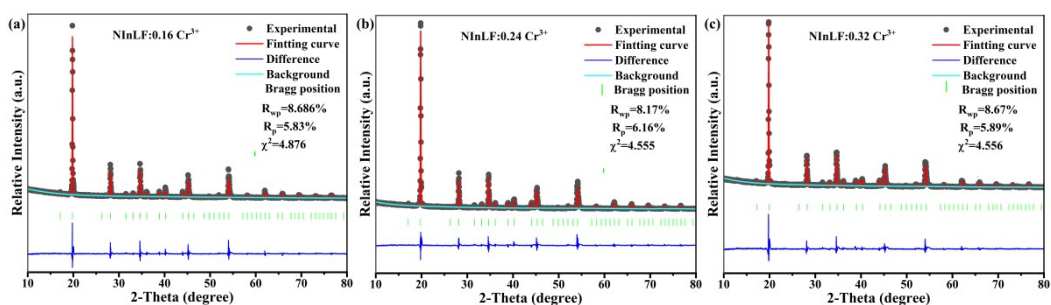

S3 Rietveld refinements of NInLF:0.16Cr<sup>3+</sup> (a), NInLF:0.24Cr<sup>3+</sup> (b) and NInLF:0.32Cr<sup>3+</sup> (c).

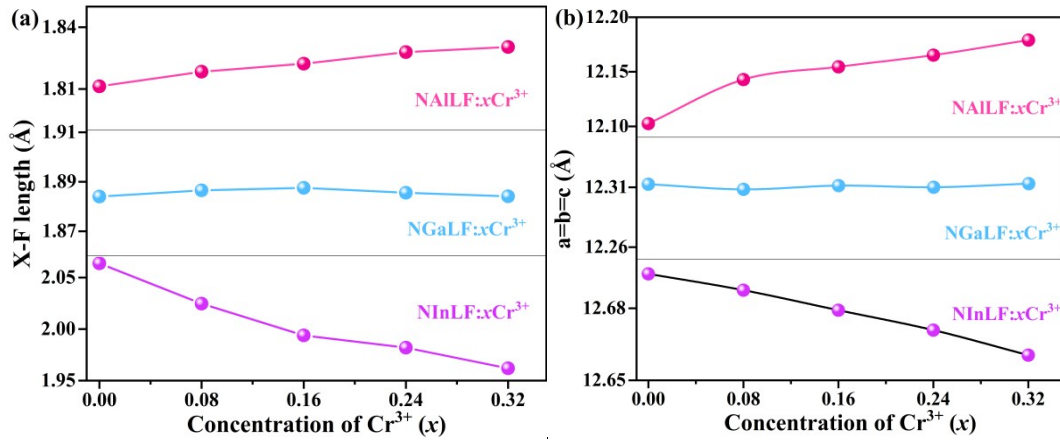

S4 (a,b) Changes of X-F bond length and crystal parameter  $a=b=c$  of  $NXLF: xCr^{3+}$  ( $X=Al, Ga, In$ )

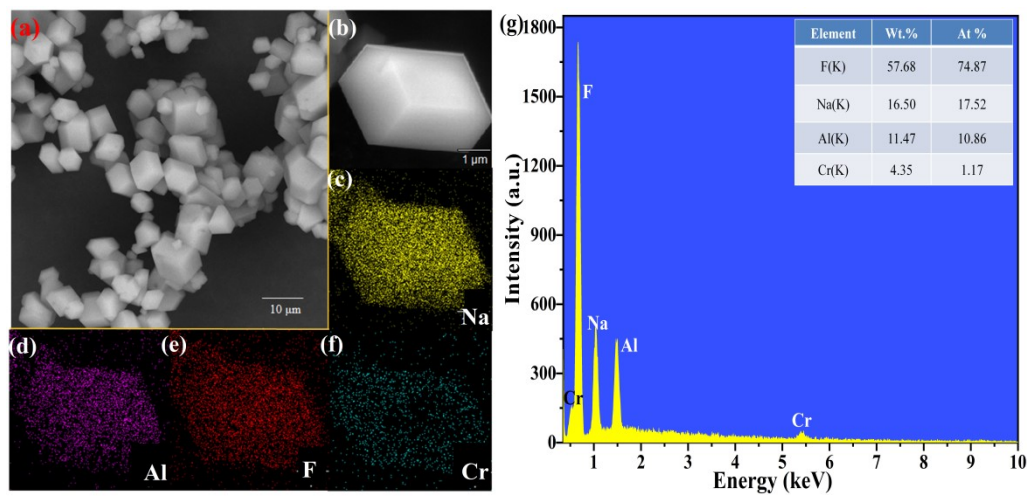

S5 (a,b) the SEM images of  $NAlF_3: 0.28Cr^{3+}$  samples. (c-f) elemental mapping of a  $NAlF_3: 0.28Cr^{3+}$  single particle, and the corresponding EDS spectrum (g).

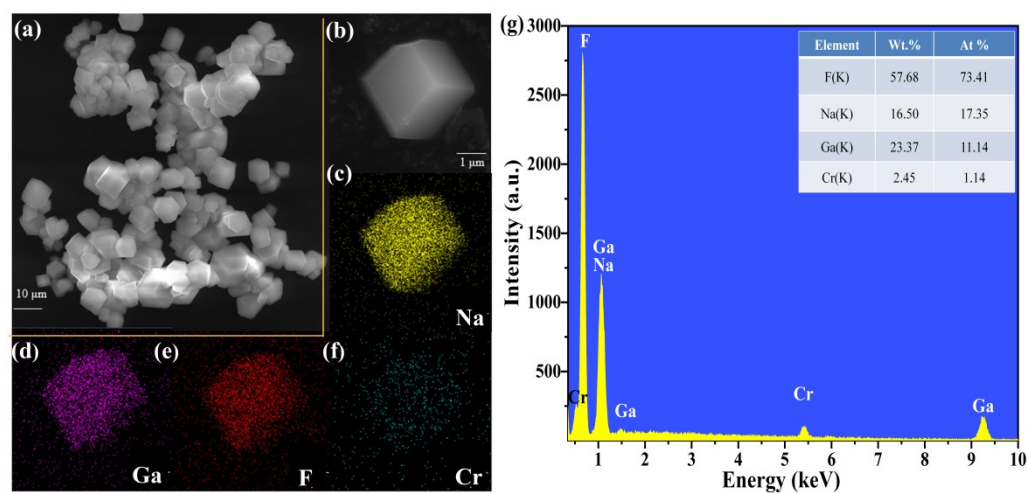

S6 (a,b) the SEM images of  $NGaF_3: 0.28Cr^{3+}$  samples. (c-f) elemental mapping of a  $NGaF_3: 0.28Cr^{3+}$  single particle, and the corresponding EDS spectrum (g).

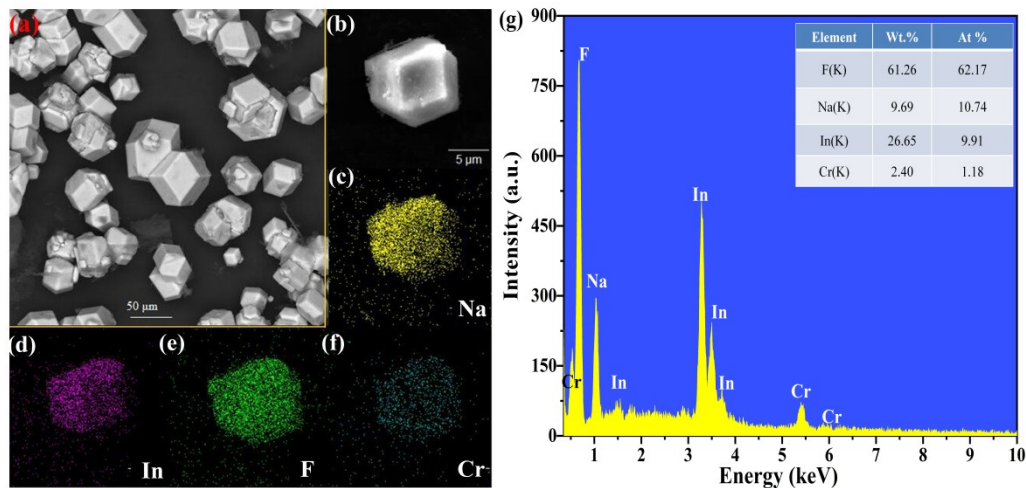

S7 (a,b) the SEM images of NiInLF:  $0.28\text{Cr}^{3+}$  samples. (c-f) elemental mapping of a NiInLF:  $0.28\text{Cr}^{3+}$  single particle, and the corresponding EDS spectrum (g).

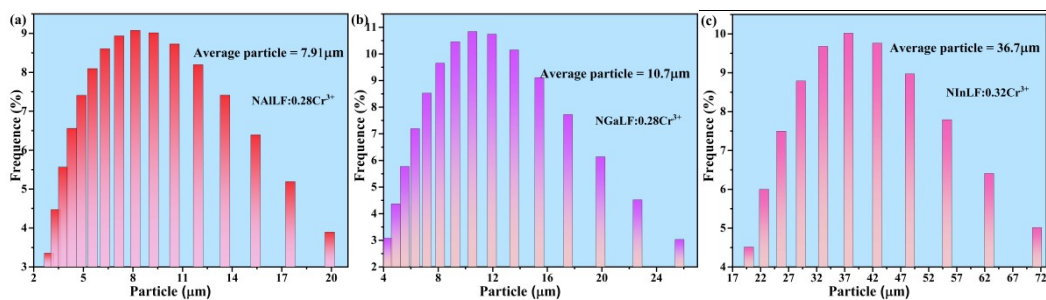

S8 Particle size distribution of NiAlLF:  $0.28\text{Cr}^{3+}$  (a), NiGaLF:  $0.28\text{Cr}^{3+}$  (b) and NiInLF:  $0.28\text{Cr}^{3+}$  (c).

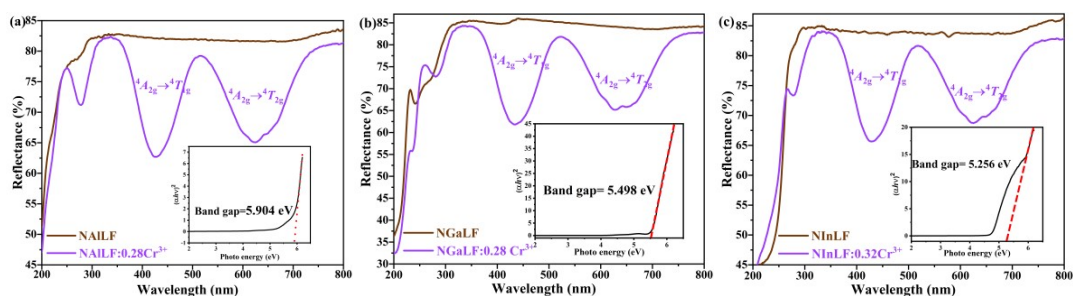

S9 (a) The DRS spectra of NiAlLF and NiAlLF:  $0.28\text{Cr}^{3+}$ , (b) The DRS spectra of NiGaLF and NiGaLF:  $0.28\text{Cr}^{3+}$ , (c) The DRS spectra of NiInLF and NiInLF:  $0.32\text{Cr}^{3+}$  (the insets represent the relationship of  $(h\nu)^2$  vs  $h\nu$  of NiXLF (X=Al, Ga, In))

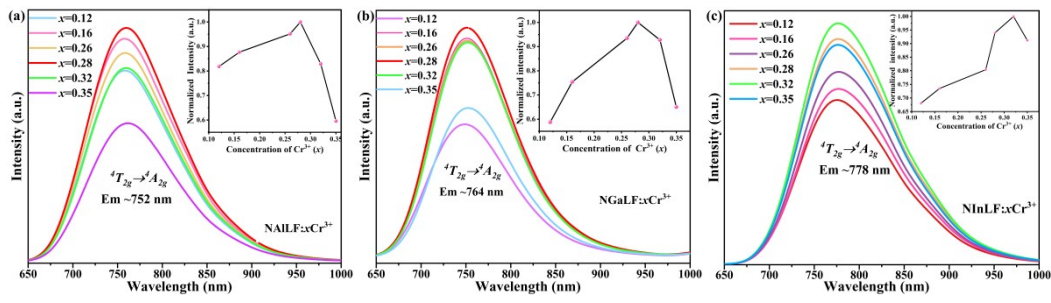

S10 The PL spectra of NAILF:  $x\text{Cr}^{3+}$  (a), NGalF:  $0.28\text{Cr}^{3+}$  (b) and NInLF:  $0.32\text{Cr}^{3+}$  (c)

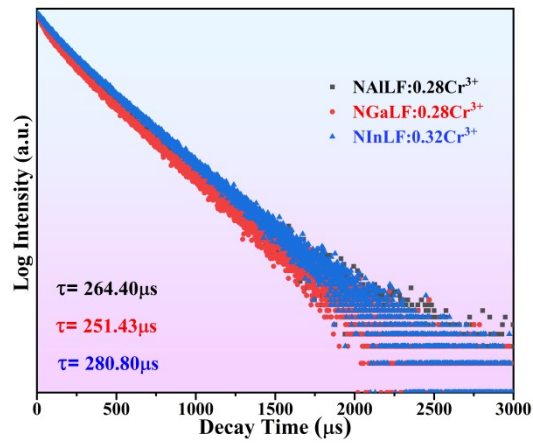

S11 The decay curves of  $\text{Cr}^{3+}$  in NXLF:  $x\text{Cr}^{3+}$  ( $X=\text{Al}, \text{Ga}, \text{In}$ )

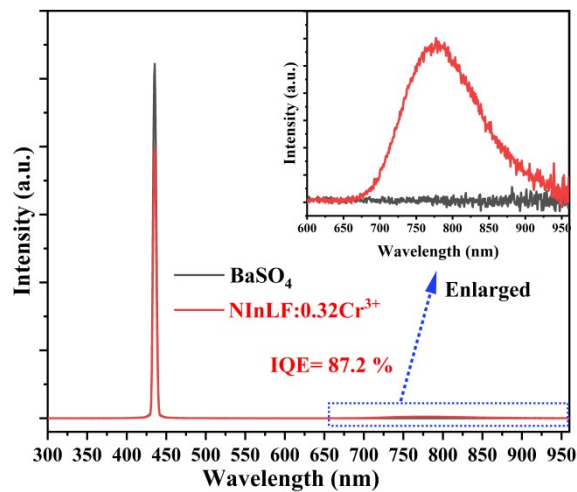

Fig. S12 Emission spectrum of NInLF:  $0.32\text{Cr}^{3+}$  phosphor measured using an integrating sphere.

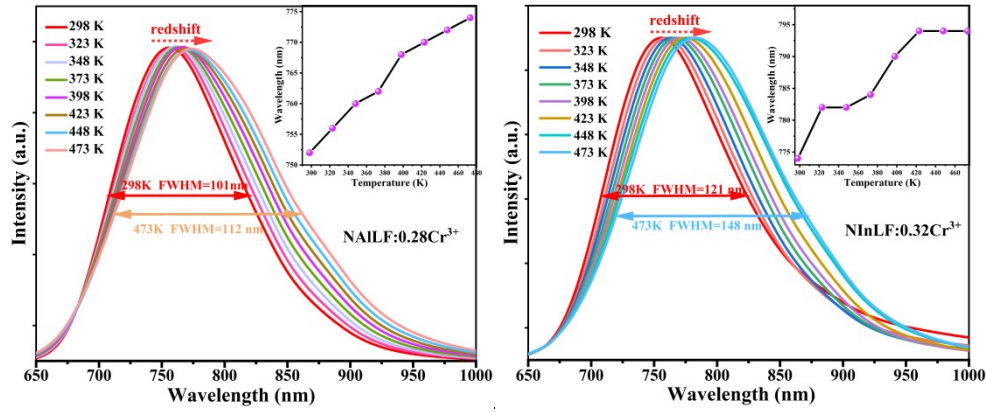

S13 Temperature-dependent PL spectra of NAILF:0.28Cr<sup>3+</sup> (a) and NInLF:0.28Cr<sup>3+</sup> (b), the insets represent the changes of emission peak position with increasing temperature.

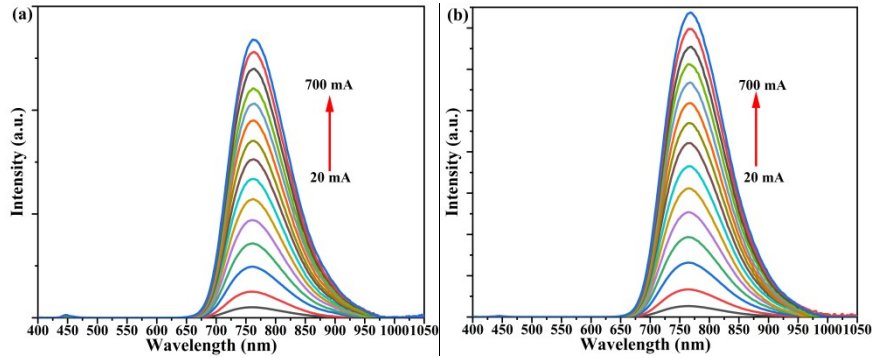

S14 Electroluminescence spectra of NIR-pc-LED on basis of NAILF:0.28Cr<sup>3+</sup>(a), and NInLF:0.28Cr<sup>3+</sup>(b).

Table S1 Refinement parameters of NAILF: xCr<sup>3+</sup> phosphors

| Formula                              | x=0      | x=0.08   | x=0.16   | x=0.24    | x=0.32   |
|--------------------------------------|----------|----------|----------|-----------|----------|
| Space group                          | I a -3 d  | I a -3 d |
| Crystal system                       | Cubic    | Cubic    | Cubic    | Cubic     | Cubic    |
| a=b=c (Å)                            | 12.102   | 12.14284 | 12.15449 | 12.16520  | 12.17897 |
| $\alpha = \beta = \gamma (^{\circ})$ | 90       | 90       | 90       | 90        | 90       |
| Z                                    | 8        | 8        | 8        | 8         | 8        |
| Volume(Å <sup>3</sup> )              | 1771.5   | 1790.459 | 1795.607 | 1800.3513 | 1806.475 |
| R <sub>p</sub> (%)                   | -        | 6.03     | 4.99     | 4.51      | 6.02     |
| R <sub>wp</sub> (%)                  | -        | 7.90     | 6.33     | 5.74      | 5.58     |
| $\chi^2$                             | -        | 3.719    | 2.428    | 3.466     | 3.945    |

|                        |        |          |          |            |          |
|------------------------|--------|----------|----------|------------|----------|
| <b>Al-F length (Å)</b> | 1.8113 | 1.818435 | 1.822302 | 1.82792(4) | 1.830420 |
|------------------------|--------|----------|----------|------------|----------|

Table S2 Refinement parameters of NGalF:  $x\text{Cr}^{3+}$  phosphors

| <b>Formula</b>                                         | $x=0$    | $x=0.08$ | $x=0.16$  | $x=0.24$   | $x=0.32$  |
|--------------------------------------------------------|----------|----------|-----------|------------|-----------|
| <b>Space group</b>                                     | I a -3 d | I a -3 d | I a -3 d  | I a -3 d   | I a -3 d  |
| <b>Crystal system</b>                                  | Cubic    | Cubic    | Cubic     | Cubic      | Cubic     |
| <b>a=b=c (Å)</b>                                       | 12.312   | 12.30827 | 12.311298 | 12.31      | 12.313    |
| <b><math>\alpha = \beta = \gamma (^{\circ})</math></b> | 90       | 90       | 90        | 90         | 90        |
| <b>Z</b>                                               | 8        | 8        | 8         | 8          | 8         |
| <b>Volume(Å<sup>3</sup>)</b>                           | 1865.4   | 1864.621 | 1866.000  | 1865.40979 | 1866.9123 |
| <b>R<sub>p</sub>(%)</b>                                | -        | 7.97     | 7.25      | 7.06       | 7.26      |
| <b>R<sub>wp</sub>(%)</b>                               | -        | 9.28     | 9.71      | 9.69       | 9.94      |
| <b><math>\chi^2</math></b>                             | -        | 1.309    | 1.120     | 1.122      | 1.182     |
| <b>Ga-F length (Å)</b>                                 | 1.8843   | 1.886513 | 1.887540  | 1.885570   | 1.894121  |

Table S3 Refinement parameters of NInLF:  $x\text{Cr}^{3+}$  phosphors

| <b>Formula</b>                                         | $x=0$    | $x=0.08$   | $x=0.16$   | $x=0.24$   | $x=0.32$ |
|--------------------------------------------------------|----------|------------|------------|------------|----------|
| <b>Space group</b>                                     | I a -3 d | I a -3 d   | I a -3 d   | I a -3 d   | I a -3 d |
| <b>Crystal system</b>                                  | Cubic    | Cubic      | Cubic      | Cubic      | Cubic    |
| <b>a=b=c (Å)</b>                                       | 12.69431 | 12.6875    | 12.67916   | 12.67086   | 12.66046 |
| <b><math>\alpha = \beta = \gamma (^{\circ})</math></b> | 90       | 90         | 90         | 90         | 90       |
| <b>Z</b>                                               | 8        | 8          | 8          | 8          | 8        |
| <b>Volume(Å<sup>3</sup>)</b>                           | 2045.63  | 2042.3614  | 2038.318   | 2034.319   | 2029.319 |
| <b>R<sub>p</sub>(%)</b>                                | -        | 7.06       | 8.686      | 8.71       | 8.67     |
| <b>R<sub>wp</sub>(%)</b>                               | -        | 5.44       | 5.83       | 6.16       | 5.89     |
| <b><math>\chi^2</math></b>                             | -        | 3.898      | 4.876      | 4.555      | 4.556    |
| <b>In-F length (Å)</b>                                 | 2.063718 | 2.02459(4) | 1.99385(2) | 1.98193(6) | 1.961936 |

Table S4 Refinement parameters of N<sub>Ga</sub>LF: 0.28Cr<sup>3+</sup> phosphor at different temperatures.

| <b>Formula</b>                                         | 298K     | 323K     | 373K     | 423K     |
|--------------------------------------------------------|----------|----------|----------|----------|
| <b>Space group</b>                                     | I a -3 d |
| <b>Crystal system</b>                                  | Cubic    | Cubic    | Cubic    | Cubic    |
| <b>a=b=c (Å)</b>                                       | 12.31    | 12.33    | 12.35    | 12.37    |
| <b><math>\alpha = \beta = \gamma (^{\circ})</math></b> | 90       | 90       | 90       | 90       |
| <b>Z</b>                                               | 8        | 8        | 8        | 8        |
| <b>Volume(Å<sup>3</sup>)</b>                           | 1865.40  | 1875.10  | 1885.56  | 1895.30  |
| <b>R<sub>p</sub>(%)</b>                                | 9.98     | 9.81     | 10.22    | 10.40    |
| <b>R<sub>wp</sub>(%)</b>                               | 7.41     | 7.18     | 7.51     | 7.59     |
| <b><math>\chi^2</math></b>                             | 3.225    | 3.118    | 3.366    | 3.493    |
| <b>Ga-F length (Å)</b>                                 | 1.856678 | 1.858361 | 1.861412 | 1.862724 |
